# Supplementary material
Source: publisher figshare collection journal article supplement (https://geolsoc.figshare.com/ndownloader/files/17992907)
Supplement: Supplementary file 1 [file 17992907]

## Sheet: SM Table 4 Ar-Ar
SM Table 5. Summary of Ar-Ar mica results
	Relative Abundances			36Ar [fA]	%1s	37Ar [fA]	%1s	38Ar [fA]	%1s	39Ar [fA]	%1s	40Ar [fA]	%1s	40(r)/39(k)	± 2s	Age	± 2s	40Ar(r)	39Ar(k)	K/Ca	± 2s		Normal Isochron			39(k)/36(a)	± 2s	40(a+r)/36(a)	± 2s	r.i.		Inverse Isochron			39(k)/40(a+r)	± 2s	36(a)/40(a+r)	± 2s	r.i.
																(Ma)		(%)	(%)
	ACO14041B-1A	0.10 W		0.741457	13147	0.053132	2820240	0.520908	16700	1451425	0.619	725678	0.036	3474933	± 4.03317	246.9	± 26.79	69.5	3.95	117.5	± 6625.5		ACO14041B-1A	0.10 W		19.58	± 5.15	978.78	± 257.38	0.9989		ACO14041B-1A	0.10 W		0.0200012	± 0.0002480	0.00102168	± 0.00026866	0.0002
	ACO14041B-1B	0.20 W	4	0.190012	67052	5104288	28005	15202689	6010	9338214	0.046	5087634	0.031	5388037	± 0.81673	369.69	± 5.07	98.89	25.42	7.9	± 4.4		ACO14041B-1B	0.20 W	4	495.15	± 669.04	26977.3	± 36451.51	10000		ACO14041B-1B	0.20 W	4	0.0183543	± 0.0000201	3.707e-05	± 0.00005009	0.0003
	ACO14041B-1C	0.30 W	4	0.0184844	313804	4528197	33154	16854372	6251	11016284	0.106	5893357	0.032	5345093	± 0.33570	367.02	± 2.09	99.91	29.99	10.5	± 6.9		ACO14041B-1C	0.30 W	4	6399.75	± 43132.95	342371	± 2307508.02	10000		ACO14041B-1C	0.30 W	4	0.0186924	± 0.0000412	2.92e-06	± 0.00001969	0
	ACO14041B-1D	0.40 W	4	0.0152408	512884	4615619	29165	0.840432	9818	6039734	0.083	3213175	0.027	5313352	± 0.77828	365.05	± 4.84	99.87	16.44	5.6	± 3.3		ACO14041B-1D	0.40 W	4	4315.11	± 48200.38	229575	± 2564389.74	10000		ACO14041B-1D	0.40 W	4	0.018796	± 0.0000329	4.36e-06	± 0.00004866	0
	ACO14041B-1D	0.50 W	4	0.22712	59777	0.373325	421012	0.427615	22847	2453700	0.238	1294772	0.019	5000291	± 3.31189	345.47	± 20.83	94.76	6.68	28.3	± 238.0		ACO14041B-1E	0.50 W	4	108	± 129.07	5698.71	± 6810.69	10000		ACO14041B-1E	0.50 W	4	0.0189513	± 0.0000904	0.00017548	± 0.00020972	0
	ACO14041B-1D	0.60 W	4	0.0562313	180557	3697950	32893	0.26918	29149	1675803	0.518	893830	0.014	5236075	± 3.65808	360.24	± 22.82	98.15	4.56	1.9	± 1.3		ACO14041B-1F	0.60 W	4	303.32	± 1115.01	16180.7	± 59479.74	10000		ACO14041B-1F	0.60 W	4	0.0187459	± 0.0001944	6.18e-05	± 0.00022718	0
	ACO14041B-1D	0.70 W		0.397853	16309	2375921	82004	0.306698	34007	1825315	0.483	961929	0.014	4620691	± 2.16907	321.44	± 13.82	87.67	4.97	3.3	± 5.4		ACO14041B-1G	0.70 W		45.95	± 15.02	2421.61	± 791.18	0.9996		ACO14041B-1G	0.70 W		0.0189741	± 0.0001833	0.00041295	± 0.00013492	0
	ACO14041B-1D	0.80 W		0.145253	56557	0.073543	1849799	0.480882	22757	1431276	0.406	738895	0.024	4859662	± 3.44943	336.6	± 21.80	94.13	3.9	83.7	± 3096.0		ACO14041B-1H	0.80 W		98.59	± 111.58	5089.59	± 5760.19	10000		ACO14041B-1H	0.80 W		0.0193707	± 0.0001576	0.00019648	± 0.00022237	0
	ACO14041B-1D	0.90 W		0.14256	69178	0.676468	152187	0.56483	20760	296382	3483	181730	0.11	4699333	± 20.13667	326.44	± 127.98	76.63	0.81	1.9	± 5.7		ACO14041B-1I	0.90 W		20.83	± 28.91	1277.28	± 1770.71	0.9987		ACO14041B-1I	0.90 W		0.0163066	± 0.0011368	0.00078291	± 0.00108536	0
	ACO14041B-1D	1.00 W		0.0977803	58507	1368354	101013	0.239756	33827	704256	1324	368740	0.046	4823678	± 5.01597	334.33	± 31.74	92.11	1.92	2.2	± 4.5		ACO14041B-1J	1.00 W		72.3	± 84.97	3786.19	± 4448.27	0.9997		ACO14041B-1J	1.00 W		0.0190966	± 0.0005060	0.00026412	± 0.00031030	0
	ACO14041B-1D	1.20 W		0.112398	68836	1472467	85894	0.0612065	122215	443320	1261	257010	0.081	5044310	± 10.49955	348.23	± 65.93	86.99	1.21	1.3	± 2.2		ACO14041B-1K	1.20 W		39.57	± 54.68	2294.55	± 3170.01	0.9998		ACO14041B-1K	1.20 W		0.0172454	± 0.0004360	0.00043581	± 0.00060209	0.0001
	ACO14041B-1D	1.40 W		0.092055	111955	0.421075	271561	0.083916	122974	0.80232	10617	49000	0.246	2677637	± 76.86971	193.16	± 525.92	43.86	0.22	0.8	± 4.5		ACO14041B-1L	1.40 W		8.71	± 19.57	531.71	± 1189.27	0.9955		ACO14041B-1L	1.40 W		0.0163801	± 0.0034779	0.00188074	± 0.00420664	0.0001
	ACO14041B-1D	1.60 W		0.111694	65951	0.550443	222791	0.0993019	71376	0.08047	81935	25665	0.599	9541430	± 565.73951	928.85	± 7198.67	30.06	0.02	0.1	± 0.3		ACO14041B-1M	1.60 W		0.72	± 1.52	229.51	± 302.39	0.6283		ACO14041B-1M	1.60 W		0.0031505	± 0.0051389	0.00435712	± 0.00574073	0.0001
	ACO14041B-1D	1.80 W		0.0230802	333442	0.456525	292794	0.103408	82374	0.05313	270834	24919	0.339	34218096	± 2057.62287	1613.44	± 6418.41	72.52	0.01	0	± 0.4		ACO14041B-1N	1.80 W		2.3	± 19.90	1086.3	± 7289.07	0.7763		ACO14041B-1N	1.80 W		0.0021194	± 0.0115493	0.00092056	± 0.00617692	0
	ACO14041B-1D	2.00 W		0.131783	87463	0.191188	617008	0.079013	179462	0.3365	34815	10115	2231	8675112	± 213.15004	562.96	± 1188.61	288.7	0.09	0.8	± 9.4		ACO14041B-1O	2.00 W		2.56	± 4.81	76.8	± 134.45	0.9289		ACO14041B-1O	2.00 W		0.0332779	± 0.0232105	0.0130214	± 0.02279617	0.0016
			S	25030017	14358	23268811	22947	72828510	5162	36735653	0.093	19726448	0.013
	Information on Analysis and Constants Used in Calculations									Results		40(a)/36(a)	± 2s	40(r)/39(k)	± 2s	Age	± 2s	MSWD	39Ar(k)	K/Ca	± 2s
																(Ma)			(%,n)
	Project = H45				Age Equations = Min et al. (2000)					Age Plateau				5342829	± 0.36334	366.88	± 5.24	1.61	83.09	3	± 2.2
	Analyst = Roberto Siqueira/Danilo Anacleto				Negative Intensities = Allowed										± 0.68%		± 1.43%	0.17	5
	Sample =14041B_1				Decay Constant 40K = 5.530 ± 0.048 E-10 1/a					Full External Error							± 8.98	2.41	2? Confidence Limit
	Material = biotite				Decay Constant 39Ar = 2.940 ± 0.016 E-07 1/h					Analytical Error							± 2.26	12686	Error Magnification
	Lithology = schist				Decay Constant 37Ar = 8.230 ± 0.012 E-04 1/h
	Mass Discrimination Law = LIN				Decay Constant 36Cl = 2.257 ± 0.015 E-06 1/a					Total Fusion Age				5167148	± 0.59209	355.93	± 5.91		15	6.8	± 3.1
	Irradiation = OR2				Decay Activity 40K(EC,??) = 3.310 ± 0.040 1/gs										± 1.15%		± 1.66%
	J = 0.00423 ± 0.00003				Decay Activity 40K(??) = 28.270 ± 0.050 1/gs					Full External Error							± 9.24
	FC = 28.2 ± 0.04 Ma				Atmospheric Ratio 40/36(a) = 298.50					Analytical Error							± 3.70
					Atmospheric Ratio 38/36(a) = 0.1869
					Production Ratio 39/37(ca) = 0.000695 ± 0.000009					Normal Isochron		51.93	± 112.24	5340165	± 0.53294	366.72	± 5.77	1.02	83.09
					Production Ratio 38/37(ca) = 0.000020 ± 0.000001								± 216.13%		± 1.00%		± 1.57%	0.38	5
					Production Ratio 36/37(ca) = 0.000265 ± 0.000002					Full External Error							± 9.30	2.63	2? Confidence Limit
					Production Ratio 40/39(k) = 0.000730 ± 0.000092					Analytical Error							± 3.31	10096	Error Magnification
					Production Ratio 38/39(k) = 0.012200												1		Number of Iterations
					Production Ratio 36/38(cl) = 262.80 ± 1.71												0.0002028		Convergence
					Scaling Ratio K/Ca = 0.430 ± 0.009
					Abundance Ratio 40K/K = 1.1700 ± 0.0100 E-04					Inverse Isochron Clustered Points		876.05	± 2253.63	5316556	± 0.98013	365.25	± 7.71	1.23	83.09
					Atomic Weight K = 39.0983 ± 0.0001 g								± 257.25%		± 1.84%		± 2.11%	0.3	5
	Instrument = Argus VI (ThermoScientific, Bremen DE)									Full External Error							± 10.59	2.63	2? Confidence Limit
										Analytical Error							± 6.10	11076	Error Magnification
																	4		Number of Iterations
																	8.26511		Convergence
																	0.03		Spreading Factor
	Relative Abundances			36Ar [fA]	%1s	37Ar [fA]	%1s	38Ar [fA]	%1s	39Ar [fA]	%1s	40Ar [fA]	%1s	40(r)/39(k)	± 2s	Age	± 2s	40Ar(r)	39Ar(k)	K/Ca	± 2s		Normal Isochron			39(k)/36(a)	± 2s	40(a+r)/36(a)	± 2s	r.i.		Inverse Isochron			39(k)/40(a+r)	± 2s	36(a)/40(a+r)	± 2s	r.i.
																(Ma)		(%)	(%)
	ACO14041B-2A	0.10 W		0.562407	9980	1594469	142882	0.207653	33087	1043044	1173	559913	0.022	3756881	± 3.33184	265.53	± 21.90	69.99	2.33	2.8	± 8.0		ACO14041B-2A	0.10 W		18.53	± 3.72	994.81	± 198.42	0.9931		ACO14041B-2A	0.10 W		0.0186309	± 0.0004373	0.00100522	± 0.00020050	0
	ACO14041B-2B	0.20 W	4	0.152911	75635	0.537474	356962	0.190079	65444	4986907	0.207	2767502	0.022	5458062	± 1.40309	374.03	± 8.69	98.35	11.16	39.9	± 284.8		ACO14041B-2B	0.20 W	4	326.43	± 494.26	18115.4	± 27429.11	10000		ACO14041B-2B	0.20 W	4	0.0180196	± 0.0000750	5.52e-05	± 0.00008358	0
	ACO14041B-2C	0.30 W	4	0.27076	28919	1390256	120773	13074823	5601	11306412	0.139	6304399	0.015	5504250	± 0.44103	376.89	± 2.73	98.71	25.3	35	± 84.5		ACO14041B-2C	0.30 W	4	417.02	± 240.87	23252.2	± 13430.55	10000		ACO14041B-2C	0.30 W	4	0.0179346	± 0.0000500	4.301e-05	± 0.00002484	0.0001
	ACO14041B-2D	0.40 W	4	0.0621868	177293	2453038	77507	10541883	8442	8371876	0.123	4623193	0.009	5500390	± 0.79785	376.65	± 4.93	99.6	18.74	14.7	± 22.8		ACO14041B-2D	0.40 W	4	1360.58	± 4875.93	75135.5	± 269264.62	10000		ACO14041B-2D	0.40 W	4	0.0181083	± 0.0000446	1.331e-05	± 0.00004770	0
	ACO14041B-2E	0.50 W	4	0.0266005	196635	2305945	63965	0.846048	9212	3971048	0.236	2191787	0.03	5500090	± 0.82873	376.63	± 5.12	99.65	8.89	7.4	± 9.5		ACO14041B-2E	0.50 W	4	1532.7	± 6189.05	84598.6	± 341608.25	10000		ACO14041B-2E	0.50 W	4	0.0181174	± 0.0000861	1.182e-05	± 0.00004773	0
	ACO14041B-2F	0.60 W	4	0.0261177	469770	0.972239	112862	0.390546	23015	4213863	0.285	2296327	0.013	5431154	± 1.76578	372.36	± 10.94	99.66	9.43	18.6	± 42.1		ACO14041B-2F	0.60 W	4	1629.46	± 15462.01	88797.1	± 842597.90	10000		ACO14041B-2F	0.60 W	4	0.0183504	± 0.0001049	1.126e-05	± 0.00010686	0
	ACO14041B-2G	0.70 W	4	0.0080883	1182353	0.544131	330651	0.575451	11753	3604775	0.326	2015067	0.012	5596821	± 1.62540	382.6	± 10.01	100.12	8.07	28.5	± 188.4		ACO14041B-2G	0.70 W	4	4361.84	± 100949.75	243826	± 5643068.32	10000		ACO14041B-2G	0.70 W	4	0.0178892	± 0.0001167	4.1e-06	± 0.00009492	0
	ACO14041B-2H	0.80 W	4	0.170957	71570	0.773602	304400	0.53067	21272	1928186	0.499	1053655	0.027	5200316	± 3.82397	358	± 23.88	95.16	4.32	10.7	± 65.2		ACO14041B-2H	0.80 W	4	112.96	± 161.95	6172.79	± 8849.57	10000		ACO14041B-2H	0.80 W	4	0.0182997	± 0.0001830	0.000162	± 0.00023225	0
	ACO14041B-2I	0.90 W	4	0.181984	69899	2408170	81803	0.122097	103277	1575024	0.572	839374	0.033	4982567	± 4.85484	344.35	± 30.55	93.5	3.53	2.8	± 4.6		ACO14041B-2I	0.90 W	4	86.25	± 120.17	4596.17	± 6402.96	10000		ACO14041B-2I	0.90 W	4	0.0187665	± 0.0002150	0.00021757	± 0.00030310	0
	ACO14041B-2J	1.00 W	4	0.0395426	209548	3130182	70684	0.177999	54716	1290294	0.524	680142	0.028	5182466	± 3.87307	356.89	± 24.20	98.3	2.89	1.8	± 2.5		ACO14041B-2J	1.00 W	4	333.27	± 1426.80	17570	± 75221.17	10000		ACO14041B-2J	1.00 W	4	0.018968	± 0.0001993	5.692e-05	± 0.00024367	0
	ACO14041B-2K	1.20 W	4	0.0030505	2252495	0.595769	258829	0.249044	28317	469665	1917	266398	0.071	5693193	± 9.00421	388.53	± 55.30	100.36	1.05	3.4	± 17.5		ACO14041B-2K	1.20 W	4	1444.02	± 61019.57	81912.1	± 3461346.61	10000		ACO14041B-2K	1.20 W	4	0.0176288	± 0.0006765	1.221e-05	± 0.00051588	0
	ACO14041B-2L	1.40 W	4	0.0658919	135387	5162961	30140	0.102136	74369	817375	1504	451059	0.043	5766482	± 6.74580	393.02	± 41.32	104.45	1.83	0.7	± 0.4		ACO14041B-2L	1.40 W	4	121.46	± 322.21	6705.75	± 17787.34	0.9999		ACO14041B-2L	1.40 W	4	0.0181135	± 0.0005453	0.00014913	± 0.00039556	0
	ACO14041B-2M	1.60 W	4	0.0147549	680399	0.421218	577073	0.264551	32239	246583	4193	127372	0.153	5342692	± 24.71359	366.87	± 153.60	103.44	0.55	2.5	± 29.1		ACO14041B-2M	1.60 W	4	167.79	± 2292.39	8666.22	± 118394.84	10000		ACO14041B-2M	1.60 W	4	0.0193618	± 0.0016247	0.00011539	± 0.00157642	0
	ACO14041B-2N	1.80 W	4	0.0426341	228548	2301202	69008	0.0156602	579131	711455	1015	392644	0.063	5336179	± 8.24630	366.47	± 51.26	96.71	1.59	1.3	± 1.8		ACO14041B-2N	1.80 W	4	164.56	± 741.60	9079.63	± 40917.69	10000		ACO14041B-2N	1.80 W	4	0.0181239	± 0.0003685	0.00011014	± 0.00049633	0
	ACO14041B-2O	2.00 W		0.133604	85039	2525082	90027	0.271463	24158	147233	6458	85397	0.189	3109649	± 46.29994	222.47	± 311.68	53.55	0.33	0.3	± 0.5		ACO14041B-2O	2.00 W		11.07	± 18.98	642.64	± 1098.93	0.9971		ACO14041B-2O	2.00 W		0.0172208	± 0.0022281	0.00155609	± 0.00266097	0.0001
			S	15779183	24126	10885106	67909	63050675	5514	44683740	0.092	24654227	0.006
	Information on Analysis and Constants Used in Calculations									Results		40(a)/36(a)	± 2s	40(r)/39(k)	± 2s	Age	± 2s	MSWD	39Ar(k)	K/Ca	± 2s
																(Ma)			(%,n)
	Project = H45				Age Equations = Min et al. (2000)					Age Plateau				5495607	± 0.33612	376.35	± 5.27	1.08	97.34	0.6	± 0.4
	Analyst = Roberto Siqueira/Danilo Anacleto				Negative Intensities = Allowed										± 0.61%		± 1.40%	0.37	13
	Sample =14041B_2				Decay Constant 40K = 5.530 ± 0.048 E-10 1/a					Full External Error							± 9.14	1.82	2? Confidence Limit
	Material = biotite				Decay Constant 39Ar = 2.940 ± 0.016 E-07 1/h					Analytical Error							± 2.08	10416	Error Magnification
	Lithology = schist				Decay Constant 37Ar = 8.230 ± 0.012 E-04 1/h
	Mass Discrimination Law = LIN				Decay Constant 36Cl = 2.257 ± 0.015 E-06 1/a					Total Fusion Age				5412319	± 0.51829	371.2	± 5.76		15	17.7	± 24.0
	Irradiation = OR2				Decay Activity 40K(EC,??) = 3.310 ± 0.040 1/gs										± 0.96%		± 1.55%
	J = 0.00423 ± 0.00003				Decay Activity 40K(??) = 28.270 ± 0.050 1/gs					Full External Error							± 9.36
	FC = 28.2 ± 0.04 Ma				Atmospheric Ratio 40/36(a) = 298.50					Analytical Error							± 3.21
					Atmospheric Ratio 38/36(a) = 0.1869
					Production Ratio 39/37(ca) = 0.000695 ± 0.000009					Normal Isochron		13.38	± 135.52	5570341	± 0.36788	380.97	± 5.40	0.57	97.34
					Production Ratio 38/37(ca) = 0.000020 ± 0.000001								± 1012.48%		± 0.66%		± 1.42%	0.85	13
					Production Ratio 36/37(ca) = 0.000265 ± 0.000002					Full External Error							± 9.28	1.85	2? Confidence Limit
					Production Ratio 40/39(k) = 0.000730 ± 0.000092					Analytical Error							± 2.27	10000	Error Magnification
					Production Ratio 38/39(k) = 0.012200												1		Number of Iterations
					Production Ratio 36/38(cl) = 262.80 ± 1.71												2.87753		Convergence
					Scaling Ratio K/Ca = 0.430 ± 0.009
					Abundance Ratio 40K/K = 1.1700 ± 0.0100 E-04					Inverse Isochron		3713.87	± 33550.00	4876601	± 5.61494	337.67	± 35.74	0.63	97.34
					Atomic Weight K = 39.0983 ± 0.0001 g								± 903.37%		± 11.51%		± 10.58%	0.81	13
	Instrument = Argus VI (ThermoScientific, Bremen DE)									Full External Error							± 36.37	1.85	2? Confidence Limit
										Analytical Error							± 35.47	10000	Error Magnification
																	7		Number of Iterations
																	0.000653571		Convergence
																	0.09		Spreading Factor
	Relative Abundances			36Ar [fA]	%1s	37Ar [fA]	%1s	38Ar [fA]	%1s	39Ar [fA]	%1s	40Ar [fA]	%1s	40(r)/39(k)	± 2s	Age	± 2s	40Ar(r)	39Ar(k)	K/Ca	± 2s		Normal Isochron		39(k)/36(a)	± 2s	40(a+r)/36(a)	± 2s	r.i.		Inverse Isochron			39(k)/40(a+r)	± 2s	36(a)/40(a+r)	± 2s	r.i.
																(Ma)		(%)	(%)
	ACO14041M-1A	0.10 W		0.0692331	115943	0.828034	143395	0.0528905	223076	122884	7462	60652	0.199	3247171	± 39.27984	231.71	± 263.07	65.82	0.24	0.6	± 1.8		ACO14041M-1A	0.10 W	17.7	± 41.01	873.34	± 2018.92	0.9979		ACO14041M-1A	0.10 W		0.0202702	± 0.0030248	0.00114503	± 0.00264698	0
	ACO14041M-1B	0.20 W		0.47929	16079	3581333	30712	0.113038	94929	720110	1633	434264	0.029	4038368	± 6.52205	283.94	± 42.44	66.99	1.4	0.9	± 0.5		ACO14041M-1B	0.20 W	15	± 4.84	904.26	± 290.22	0.9949		ACO14041M-1B	0.20 W		0.0165882	± 0.0005415	0.00110588	± 0.00035493	0
	ACO14041M-1C	0.30 W	4	0.197246	54981	1690247	90568	0.815239	9299	7603787	0.15	4553952	0.015	5911285	± 0.86994	401.87	± 5.30	98.7	14.77	19.3	± 35.0		ACO14041M-1C	0.30 W	384.63	± 421.99	23035.1	± 25272.65	10000		ACO14041M-1C	0.30 W	4	0.0166976	± 0.0000504	4.341e-05	± 0.00004763	0
	ACO14041M-1D	0.40 W	4	0.26888	31919	0.905584	153312	16656827	4916	13600019	0.067	8160111	0.016	5940904	± 0.38560	403.68	± 2.35	99.01	26.41	64.6	± 198.0		ACO14041M-1D	0.40 W	505.35	± 322.32	30321.1	± 19339.31	10000		ACO14041M-1D	0.40 W	4	0.0166667	± 0.0000230	3.298e-05	± 0.00002104	0.0001
	ACO14041M-1E	0.50 W	4	0.0179315	850808	1253623	99582	0.575855	17433	8952782	0.114	5320507	0.018	5948928	± 1.02653	404.16	± 6.25	100.1	17.39	30.7	± 61.2		ACO14041M-1E	0.50 W	4901.91	± 81894.66	291313	± 4866867.17	10000		ACO14041M-1E	0.50 W	4	0.016827	± 0.0000388	3.43e-06	± 0.00005735	0
	ACO14041M-1F	0.60 W	4	0.139781	60675	1557748	100375	0.529326	25413	5928199	0.143	3529731	0.022	6024767	± 0.87161	408.78	± 5.29	101.18	11.51	16.4	± 32.9		ACO14041M-1F	0.60 W	422.85	± 511.62	25177.1	± 30462.63	10000		ACO14041M-1F	0.60 W	4	0.0167949	± 0.0000484	3.972e-05	± 0.00004806	0.0001
	ACO14041M-1G	0.70 W	4	0.239789	56940	1391507	126714	0.45524	19741	5147265	0.264	3024584	0.025	6015412	± 1.61536	408.21	± 9.81	102.37	10	15.9	± 40.3		ACO14041M-1G	0.70 W	214.32	± 243.70	12594	± 14320.10	10000		ACO14041M-1G	0.70 W	4	0.017018	± 0.0000901	7.94e-05	± 0.00009029	0
	ACO14041M-1H	0.80 W	4	0.139967	63030	0.031326	4023943	0.234777	31815	2641125	0.406	1548394	0.015	6020764	± 2.05330	408.53	± 12.47	102.7	5.13	362.5	± 29176.7		ACO14041M-1H	0.80 W	188.68	± 237.85	11061.7	± 13943.65	10000		ACO14041M-1H	0.80 W	4	0.0170574	± 0.0001386	9.04e-05	± 0.00011395	0
	ACO14041M-1I	0.90 W	4	0.158774	48515	5542992	13882	0.224349	36241	1580767	0.685	943043	0.019	5669996	± 3.01190	387.1	± 18.51	95.02	3.07	1.2	± 0.3		ACO14041M-1I	0.90 W	100.47	± 98.40	5994.96	± 5871.27	0.9999		ACO14041M-1I	0.90 W	4	0.0167585	± 0.0002298	0.00016681	± 0.00016337	0
	ACO14041M-1J	1.00 W	4	0.0245782	444786	4293433	29426	0.0565283	185334	950684	0.631	570452	0.029	5928622	± 6.90791	402.93	± 42.09	98.77	1.85	1	± 0.6		ACO14041M-1J	1.00 W	405.45	± 3781.82	24335.9	± 226994.02	10000		ACO14041M-1J	1.00 W	4	0.0166604	± 0.0002105	4.109e-05	± 0.00038328	0
	ACO14041M-1K	1.20 W	4	0.0339756	281495	0.550527	288923	0.267252	20610	751689	1008	432969	0.039	5625962	± 7.68069	384.39	± 47.28	97.67	1.46	5.9	± 33.9		ACO14041M-1K	1.20 W	222.42	± 1258.91	12811.6	± 72514.63	10000		ACO14041M-1K	1.20 W	4	0.0173606	± 0.0003504	7.805e-05	± 0.00044180	0
	ACO14041M-1L	1.40 W	4	0.128841	105690	0.409402	264101	0.145924	83973	498614	2185	278299	0.097	4810975	± 16.44063	333.52	± 104.08	86.19	0.97	5.2	± 27.7		ACO14041M-1L	1.40 W	38.73	± 81.95	2161.8	± 4573.49	0.9998		ACO14041M-1L	1.40 W	4	0.0179157	± 0.0007838	0.00046258	± 0.00097863	0
	ACO14041M-1M	1.60 W	4	0.0102494	551620	0.616522	236078	0.177381	51590	827649	1093	464900	0.063	5580959	± 4.25752	381.62	± 26.25	99.35	1.61	5.8	± 27.3		ACO14041M-1M	1.60 W	820.55	± 9199.49	46093	± 516765.40	10000		ACO14041M-1M	1.60 W	4	0.017802	± 0.0003897	2.17e-05	± 0.00024323	0
	ACO14041M-1N	1.80 W	4	0.130695	68120	0.699106	115455	0.315249	51143	1972366	0.554	1162991	0.015	5698978	± 2.76780	388.88	± 16.99	96.65	3.83	12.1	± 28.0		ACO14041M-1N	1.80 W	151.12	± 206.19	8911.02	± 12157.65	10000		ACO14041M-1N	1.80 W	4	0.0169592	± 0.0001878	0.00011222	± 0.00015311	0
	ACO14041M-1O	2.00 W		0.0802294	142700	1110315	132331	0.0290588	333251	0.6576	15317	44330	0.432	3116300	± 104.49849	222.92	± 703.28	46.17	0.13	0.3	± 0.7		ACO14041M-1O	2.00 W	8.22	± 23.67	554.57	± 1588.58	0.9943		ACO14041M-1O	2.00 W		0.014817	± 0.0045463	0.0018032	± 0.00516533	0.0001
	ACO14041M-1P	2.20 W		0.274063	59811	1616792	79261	0.0215422	592054	123120	7140	69926	0.205	955624	± 79.56961	74.26	± 631.16	16.81	0.24	0.3	± 0.5		ACO14041M-1P	2.20 W	4.5	± 5.42	255.54	± 306.17	0.993		ACO14041M-1P	2.20 W		0.0175913	± 0.0025156	0.00391326	± 0.00468851	0.0001
	ACO14041M-1Q	2.40 W		0.652956	13582	1152862	149191	0.152508	55847	0.05371	162894	1829	8766	354355798	± 11417.27910	0	± 6244.93	10563.7	0.01	0	± 0.1		ACO14041M-1Q	2.40 W	0.08	± 0.27	2.8	± 0.90	0.0708		ACO14041M-1Q	2.40 W		0.0298118	± 0.0958473	0.357252	± 0.11546409	0.0296
			S	19715416	22280	10915232	51016	44535302	9595	51492191	0.08	30600934	0.007
	Information on Analysis and Constants Used in Calculations									Results		40(a)/36(a)	± 2s	40(r)/39(k)	± 2s	Age	± 2s	MSWD	39Ar(k)	K/Ca	± 2s
																(Ma)			(%,n)
	Project = H45				Age Equations = Min et al. (2000)					Age Plateau				5944035	± 0.37375	403.87	± 5.64	1.57	97.99	1.2	± 0.3
	Analyst = Roberto Siqueira/Danilo Anacleto				Negative Intensities = Allowed										± 0.63%		± 1.40%	0.1	12
	Sample =14041M_1				Decay Constant 40K = 5.530 ± 0.048 E-10 1/a					Full External Error							± 9.75	1.85	2? Confidence Limit
	Material = white mica (muscovite)				Decay Constant 39Ar = 2.940 ± 0.016 E-07 1/h					Analytical Error							± 2.28	12547	Error Magnification
	Lithology = schist				Decay Constant 37Ar = 8.230 ± 0.012 E-04 1/h
	Mass Discrimination Law = LIN				Decay Constant 36Cl = 2.257 ± 0.015 E-06 1/a					Total Fusion Age				5828723	± 0.51782	396.83	± 5.98		17	20.3	± 20.7
	Irradiation = OR2				Decay Activity 40K(EC,??) = 3.310 ± 0.040 1/gs										± 0.89%		± 1.51%
	J = 0.00423 ± 0.00003				Decay Activity 40K(??) = 28.270 ± 0.050 1/gs					Full External Error							± 9.86
	FC = 28.2 ± 0.04 Ma				Atmospheric Ratio 40/36(a) = 298.50					Analytical Error							± 3.17
					Atmospheric Ratio 38/36(a) = 0.1869
					Production Ratio 39/37(ca) = 0.000695 ± 0.000009					Normal Isochron Error Chron		36.76	± 72.52	5932283	± 0.28529	403.15	± 5.44	1.93	97.99
					Production Ratio 38/37(ca) = 0.000020 ± 0.000001								± 197.27%		± 0.48%		± 1.35%	0.04	12
					Production Ratio 36/37(ca) = 0.000265 ± 0.000002					Full External Error							± 9.62	1.89	2? Confidence Limit
					Production Ratio 40/39(k) = 0.000730 ± 0.000092					Analytical Error							± 1.74	13901	Error Magnification
					Production Ratio 38/39(k) = 0.012200												1		Number of Iterations
					Production Ratio 36/38(cl) = 262.80 ± 1.71												0.0002455		Convergence
					Scaling Ratio K/Ca = 0.430 ± 0.009
					Abundance Ratio 40K/K = 1.1700 ± 0.0100 E-04					Inverse Isochron		333.76	± 328.84	5940138	± 0.47848	403.63	± 5.92	1.72	97.99
					Atomic Weight K = 39.0983 ± 0.0001 g								± 98.53%		± 0.81%		± 1.47%	0.07	12
	Instrument = Argus VI (ThermoScientific, Bremen DE)									Full External Error							± 9.91	1.89	2? Confidence Limit
										Analytical Error							± 2.91	13097	Error Magnification
																	8		Number of Iterations
																	1.27434		Convergence
																	0.08		Spreading Factor
	Relative Abundances			36Ar [fA]	%1s	37Ar [fA]	%1s	38Ar [fA]	%1s	39Ar [fA]	%1s	40Ar [fA]	%1s	40(r)/39(k)	± 2s	Age	± 2s	40Ar(r)	39Ar(k)	K/Ca	± 2s		Normal Isochron			39(k)/36(a)	± 2s	40(a+r)/36(a)	± 2s	r.i.		Inverse Isochron			39(k)/40(a+r)	± 2s	36(a)/40(a+r)	± 2s	r.i.
																(Ma)		(%)	(%)
	ACO14041M-2A	0.10 W		0.131619	91320	1281410	10612	0.600701	16290	142652	5883	87900	0.242	3315885	± 50.14071	236.3	± 334.96	54.15	0.24	0.05	± 0.01		ACO14041M-2A	0.10 W		10.63	± 18.97	651.03	± 1159.15	0.9978		ACO14041M-2A	0.10 W		0.0163304	± 0.0019114	0.00153602	± 0.00273485	0.0001
	ACO14041M-2B	0.20 W		0.107662	83192	1029961	9577	0.387522	12615	1410110	0.745	1060780	0.022	7285219	± 3.94261	483.74	± 22.97	96.89	2.33	0.59	± 0.12		ACO14041M-2B	0.20 W		127.8	± 207.39	9609.16	± 15592.89	10000		ACO14041M-2B	0.20 W		0.0133	± 0.0001983	0.00010407	± 0.00016887	0
	ACO14041M-2C	0.30 W		0.0547254	168208	627572	27483	0.314927	22975	7235003	0.149	4848847	0.016	6678188	± 0.78561	448.03	± 4.67	99.65	11.96	4.96	± 2.73		ACO14041M-2C	0.30 W		1283.14	± 4189.43	85989.1	± 280752.21	10000		ACO14041M-2C	0.30 W		0.0149221	± 0.0000448	1.163e-05	± 0.00003797	0
	ACO14041M-2D	0.40 W		0.199539	49994	1172426	16588	10563083	5644	11097069	0.106	6725141	0.013	6005262	± 0.55189	407.59	± 3.35	99.1	18.34	4.07	± 1.36		ACO14041M-2D	0.40 W		547.65	± 539.20	33186.3	± 32673.91	10000		ACO14041M-2D	0.40 W		0.0165023	± 0.0000354	3.013e-05	± 0.00002967	0
	ACO14041M-2E	0.50 W		0.175356	70415	1187092	10224	0.521027	19725	10061153	0.166	6037251	0.014	5947036	± 0.75891	404.05	± 4.62	99.12	16.63	3.64	± 0.76		ACO14041M-2E	0.50 W		563.69	± 779.85	33821.3	± 46791.08	10000		ACO14041M-2E	0.50 W		0.0166667	± 0.0000555	2.957e-05	± 0.00004091	0
	ACO14041M-2F	0.60 W	4	0.0884047	78353	475528	37282	0.593627	18892	10797270	0.131	6675775	0.017	6157786	± 0.41620	416.84	± 2.52	99.6	17.84	9.76	± 7.29		ACO14041M-2F	0.60 W	4	1204.22	± 1860.60	74451.7	± 115032.93	10000		ACO14041M-2F	0.60 W	4	0.0161745	± 0.0000428	1.343e-05	± 0.00002075	0
	ACO14041M-2G	0.70 W	4	0.0895532	97944	1103522	7777	0.601024	13062	10130829	0.138	6261041	0.017	6152399	± 0.54430	416.51	± 3.29	99.56	16.74	3.95	± 0.63		ACO14041M-2G	0.70 W	4	1095.57	± 2078.24	67702.6	± 128427.78	10000		ACO14041M-2G	0.70 W	4	0.0161822	± 0.0000449	1.477e-05	± 0.00002802	0
	ACO14041M-2H	0.80 W	4	0.0346899	213864	1235432	10185	0.0580777	127595	2391918	0.625	1488890	0.017	6261554	± 2.00984	423.1	± 12.11	100.63	3.95	0.83	± 0.17		ACO14041M-2H	0.80 W	4	761.64	± 3597.30	47392.2	± 223836.15	10000		ACO14041M-2H	0.80 W	4	0.0160711	± 0.0002010	2.11e-05	± 0.00009966	0
	ACO14041M-2I	0.90 W	4	0.0258254	270779	1279025	9424	0.502123	15506	1513305	0.578	983256	0.019	6435927	± 2.85586	433.57	± 17.11	99.11	2.5	0.51	± 0.10		ACO14041M-2I	0.90 W	4	518.3	± 2481.26	33655.7	± 161120.70	10000		ACO14041M-2I	0.90 W	4	0.0154	± 0.0001781	2.971e-05	± 0.00014224	0
	ACO14041M-2J	1.00 W		0.105897	70357	1067262	11628	0.604563	16034	964988	0.942	772528	0.026	7663285	± 4.82692	505.64	± 27.78	95.8	1.6	0.39	± 0.09		ACO14041M-2J	1.00 W		88.82	± 121.75	7105.29	± 9738.19	0.9999		ACO14041M-2J	1.00 W		0.012501	± 0.0002355	0.00014074	± 0.00019289	0
	ACO14041M-2K	1.20 W		0.0167521	555368	1372476	8532	0.609825	13006	1150243	1089	746957	0.035	6522461	± 5.02940	438.75	± 30.04	100.52	1.9	0.36	± 0.06		ACO14041M-2K	1.20 W		877.77	± 12453.52	56953.5	± 808039.79	10000		ACO14041M-2K	1.20 W		0.015412	± 0.0003355	1.756e-05	± 0.00024911	0
	ACO14041M-2L	1.40 W		0.0328365	252508	1012363	13853	0.406756	21572	1010294	1500	625905	0.036	6086020	± 5.22543	412.49	± 31.67	98.3	1.67	0.43	± 0.12		ACO14041M-2L	1.40 W		284.63	± 1328.92	17621.4	± 82270.14	10000		ACO14041M-2L	1.40 W		0.0161528	± 0.0004845	5.675e-05	± 0.00026495	0
	ACO14041M-2M	1.60 W		0.0237392	389912	1085033	13910	0.526176	24101	449688	2479	297539	0.088	6429035	± 12.67455	433.16	± 75.94	97.33	0.74	0.18	± 0.05		ACO14041M-2M	1.60 W		169.25	± 1177.28	11179.4	± 77762.03	10000		ACO14041M-2M	1.60 W		0.0151391	± 0.0007499	8.945e-05	± 0.00062220	0
	ACO14041M-2N	1.80 W		0.0355837	230347	1364639	9285	0.469581	19182	970279	1026	592496	0.04	6198660	± 5.19627	419.31	± 31.37	101.61	1.6	0.31	± 0.06		ACO14041M-2N	1.80 W		303.82	± 1558.04	18534.1	± 95045.79	10000		ACO14041M-2N	1.80 W		0.0163923	± 0.0003362	5.395e-05	± 0.00027669	0
	ACO14041M-2O	2.00 W		0.11072	121275	1073000	4874	0.323107	38801	1181923	0.79	726782	0.033	6417475	± 6.85362	432.47	± 41.08	104.43	1.95	0.47	± 0.05		ACO14041M-2O	2.00 W		109.63	± 272.93	6737.08	± 16771.50	10000		ACO14041M-2O	2.00 W		0.0162729	± 0.0002572	0.00014843	± 0.00036951	0
			S	0.837411	43619	16366741	3175	14015166	25217	60506725	0.077	37931088	0.006
	Information on Analysis and Constants Used in Calculations									Results		40(a)/36(a)	± 2s	40(r)/39(k)	± 2s	Age	± 2s	MSWD	39Ar(k)	K/Ca	± 2s
																(Ma)			(%,n)
	Project = H45				Age Equations = Min et al. (2000)					Age Plateau				6162158	± 0.41114	417.1	± 5.86	1.61	41.04	0.65	± 0.55
	Analyst = Roberto Siqueira/Danilo Anacleto				Negative Intensities = Allowed										± 0.67%		± 1.41%	0.18	4
	Sample =14041M_2				Decay Constant 40K = 5.530 ± 0.048 E-10 1/a					Full External Error							± 10.07	2.63	2? Confidence Limit
	Material = white mica (muscovite)				Decay Constant 39Ar = 2.940 ± 0.016 E-07 1/h					Analytical Error							± 2.49	12684	Error Magnification
	Lithology = schist				Decay Constant 37Ar = 8.230 ± 0.012 E-04 1/h
	Mass Discrimination Law = LIN				Decay Constant 36Cl = 2.257 ± 0.015 E-06 1/a					Total Fusion Age				6224209	± 0.37305	420.85	± 5.80		15	1.59	± 0.12
	Irradiation = OR2				Decay Activity 40K(EC,??) = 3.310 ± 0.040 1/gs										± 0.60%		± 1.38%
	J = 0.00423 ± 0.00003				Decay Activity 40K(??) = 28.270 ± 0.050 1/gs					Full External Error							± 10.09
	FC = 28.2 ± 0.04 Ma				Atmospheric Ratio 40/36(a) = 298.50					Analytical Error							± 2.25
					Atmospheric Ratio 38/36(a) = 0.1869
					Production Ratio 39/37(ca) = 0.000695 ± 0.000009					Normal Isochron Overestimated Error		188.52	± 643.97	6197919	± 0.56436	419.26	± 6.33	0.11	41.04
					Production Ratio 38/37(ca) = 0.000020 ± 0.000001								± 341.60%		± 0.91%		± 1.51%	0.89	4
					Production Ratio 36/37(ca) = 0.000265 ± 0.000002					Full External Error							± 10.38	3	2? Confidence Limit
					Production Ratio 40/39(k) = 0.000730 ± 0.000092					Analytical Error							± 3.41	10000	Error Magnification
					Production Ratio 38/39(k) = 0.012200												1		Number of Iterations
					Production Ratio 36/38(cl) = 262.80 ± 1.71												2.18e-07		Convergence
					Scaling Ratio K/Ca = 0.430 ± 0.009
					Abundance Ratio 40K/K = 1.1700 ± 0.0100 E-04					Inverse Isochron Overestimated Error		6484.16	± 123278.91	5658098	± 14.44881	386.37	± 88.98	0.27	41.04
					Atomic Weight K = 39.0983 ± 0.0001 g								± 1901.23%		± 25.54%		± 23.03%	0.77	4
	Instrument = Argus VI (ThermoScientific, Bremen DE)									Full External Error							± 89.30	3	2? Confidence Limit
										Analytical Error							± 88.84	10000	Error Magnification
																	5		Number of Iterations
																	0.000169564		Convergence
																	0.04		Spreading Factor
	Relative Abundances			36Ar [fA]	%1s	37Ar [fA]	%1s	38Ar [fA]	%1s	39Ar [fA]	%1s	40Ar [fA]	%1s	40(r)/39(k)	± 2s	Age	± 2s	40Ar(r)	39Ar(k)	K/Ca	± 2s		Normal Isochron			39(k)/36(a)	± 2s	40(a+r)/36(a)	± 2s	r.i.		Inverse Isochron			39(k)/40(a+r)	± 2s	36(a)/40(a+r)	± 2s	r.i.
																(Ma)		(%)	(%)
	ACO14056-1A	0.10 W	4	0.0029689	2364625	750353	7781	0.442853	11169	2227150	0.525	1271787	0.01	5710329	± 1.97471	389.58	± 12.12	100.02	8.37	1.28	± 0.21		ACO14056-1A	0.10 W	4	21922.2	± 3029082.17	1.25153e+06	± 172929297.16	10000		ACO14056-1A	0.10 W	4	0.0175163	± 0.0001840	8e-07	± 0.00011040	0
	ACO14056-1B	0.20 W	4	0.0366631	176728	327060	37965	0.40571	24620	3976714	0.176	2271769	0.011	5684110	± 0.99307	387.97	± 6.10	99.51	14.93	5.23	± 3.98		ACO14056-1B	0.20 W	4	1059.68	± 3659.04	60531.7	± 209014.58	10000		ACO14056-1B	0.20 W	4	0.0175061	± 0.0000617	1.652e-05	± 0.00005704	0
	ACO14056-1C	0.30 W	4	0.0014881	6109060	555609	22560	0.486395	15324	6099698	0.156	3453758	0.02	5660299	± 0.90732	386.51	± 5.58	99.97	22.91	4.72	± 2.14		ACO14056-1C	0.30 W	4	20605.1	± 1265480.98	1.16661e+06	± 71648343.20	10000		ACO14056-1C	0.30 W	4	0.0176624	± 0.0000555	8.6e-07	± 0.00005264	0
	ACO14056-1D	0.40 W	4	0.0491406	163499	813512	9521	0.368731	18667	3090584	0.278	1751962	0.015	5712969	± 1.58390	389.74	± 9.72	100.8	11.61	1.63	± 0.32		ACO14056-1D	0.40 W	4	657.9	± 2250.00	37286.9	± 127520.65	10000		ACO14056-1D	0.40 W	4	0.0176442	± 0.0000981	2.682e-05	± 0.00009172	0
	ACO14056-1E	0.50 W	4	0.0726025	127628	689813	11557	0.122979	56675	1812230	0.412	1039019	0.026	5609221	± 3.08671	383.36	± 19.01	97.86	6.81	1.13	± 0.27		ACO14056-1E	0.50 W	4	243.54	± 606.40	13959.4	± 34757.21	10000		ACO14056-1E	0.50 W	4	0.0174466	± 0.0001441	7.164e-05	± 0.00017837	0
	ACO14056-1F	0.60 W	4	0.0744174	108024	276116	50499	0.179096	59468	2086271	0.457	1162331	0.018	5463235	± 2.35381	374.35	± 14.57	98.07	7.83	3.25	± 3.28		ACO14056-1F	0.60 W	4	277.64	± 594.02	15466.8	± 33090.84	10000		ACO14056-1F	0.60 W	4	0.0179509	± 0.0001641	6.465e-05	± 0.00013833	0
	ACO14056-1G	0.70 W	4	0.112841	87849	732304	14148	0.0122139	549525	1743680	0.545	972578	0.022	5379592	± 3.44345	369.17	± 21.37	96.48	6.55	1.02	± 0.29		ACO14056-1G	0.70 W	4	151.96	± 262.48	8473.19	± 14635.63	10000		ACO14056-1G	0.70 W	4	0.0179339	± 0.0001957	0.00011802	± 0.00020385	0
	ACO14056-1H	0.80 W	4	0.180786	43423	826971	8712	0.11256	74164	1828318	0.52	1019142	0.016	5273736	± 2.62069	362.58	± 16.33	94.64	6.87	0.95	± 0.17		ACO14056-1H	0.80 W	4	99.95	± 85.77	5569.69	± 4779.18	0.9999		ACO14056-1H	0.80 W	4	0.0179457	± 0.0001867	0.00017954	± 0.00015406	0
	ACO14056-1I	0.90 W		0.0125301	1004854	352201	40937	0.0322895	165081	545961	1367	321652	0.071	5952144	± 13.85795	404.36	± 84.36	101.07	2.05	0.67	± 0.55		ACO14056-1I	0.90 W		471	± 10227.53	27735.9	± 602274.76	10000		ACO14056-1I	0.90 W		0.0169815	± 0.0004647	3.605e-05	± 0.00078291	0
	ACO14056-1J	1.00 W		0.107235	82908	677699	20377	0.145264	57186	296415	2040	171410	0.079	4677286	± 17.97979	325.04	± 114.36	81.01	1.11	0.19	± 0.08		ACO14056-1J	1.00 W		27.23	± 44.42	1572.1	± 2563.88	0.9997		ACO14056-1J	1.00 W		0.0173204	± 0.0007061	0.00063609	± 0.00103738	0
	ACO14056-1K	1.20 W		0.063138	85976	803665	15139	0.115489	75473	269064	3650	169460	0.065	5562449	± 12.68484	380.48	± 78.25	88.5	1.01	0.14	± 0.05		ACO14056-1K	1.20 W		41.31	± 68.78	2596.36	± 4318.87	0.999		ACO14056-1K	1.20 W		0.0159108	± 0.0011594	0.00038515	± 0.00064068	0
	ACO14056-1L	1.40 W		0.0574817	151648	862619	16015	0.0796676	78339	368958	2104	219490	0.059	5456439	± 14.26746	373.93	± 88.33	91.87	1.39	0.18	± 0.06		ACO14056-1L	1.40 W		61.83	± 180.38	3672.34	± 10712.13	0.9999		ACO14056-1L	1.40 W		0.0168373	± 0.0007076	0.00027231	± 0.00079431	0
	ACO14056-1M	1.60 W		0.0497193	246911	682427	18304	0.0552333	184543	282621	2245	183597	0.074	6990441	± 26.07779	466.49	± 153.39	107.79	1.06	0.18	± 0.07		ACO14056-1M	1.60 W		59.09	± 302.82	3832.01	± 19637.61	10000		ACO14056-1M	1.60 W		0.0154196	± 0.0006917	0.00026096	± 0.00133732	0
	ACO14056-1N	1.80 W		0.0921846	68441	178598	54842	0.0111936	523404	763908	1747	420023	0.06	5135377	± 5.24660	353.94	± 32.84	93.41	2.87	1.84	± 2.02		ACO14056-1N	1.80 W		82.46	± 112.33	4532.99	± 6173.19	0.9997		ACO14056-1N	1.80 W		0.0181905	± 0.0006358	0.0002206	± 0.00030043	0
	ACO14056-1O	2.00 W		0.0177843	514145	663951	22286	0.163366	53459	1211073	0.447	695732	0.021	5781990	± 4.53529	393.97	± 27.77	100.69	4.55	0.78	± 0.35		ACO14056-1O	2.00 W		755.84	± 8623.55	43404.4	± 495207.25	10000		ACO14056-1O	2.00 W		0.017414	± 0.0001557	2.304e-05	± 0.00026286	0
	ACO14056-1P	2.20 W		0.114716	92324	574245	16537	0.129987	63721	0.25494	33733	9807	1966	9610028	± 252.40192	937.6	± 3227.23	253.73	0.1	0.02	± 0.01		ACO14056-1P	2.20 W		2.23	± 4.32	84.39	± 153.84	0.9393		ACO14056-1P	2.20 W		0.026403	± 0.0175699	0.0118504	± 0.02160419	0.0013
	ACO14056-1Q	2.40 W		0.0784084	104225	403890	25712	0.142336	59337	0.04461	259839	3535	3644	63682307	± 3719.57890	0	± 16845.02	753.03	0.02	0	± 0.02		ACO14056-1Q	2.40 W		0.54	± 3.21	45.71	± 96.66	0.3559		ACO14056-1Q	2.40 W		0.0118246	± 0.0655833	0.0218767	± 0.04626083	0.0005
			S	0.703002	52167	10171034	4642	15720325	20815	26623678	0.14	15137052	0.007
	Information on Analysis and Constants Used in Calculations									Results		40(a)/36(a)	± 2s	40(r)/39(k)	± 2s	Age	± 2s	MSWD	39Ar(k)	K/Ca	± 2s
																(Ma)			(%,n)
	Project = H45				Age Equations = Min et al. (2000)					Age Plateau Error Mean				5641789	± 0.78700	385.37	± 6.92	2.11	85.87	1.15	± 0.23
	Analyst = Roberto Siqueira/Danilo Anacleto				Negative Intensities = Allowed										± 1.39%		± 1.80%	0.04	8
	Sample =14056_1				Decay Constant 40K = 5.530 ± 0.048 E-10 1/a					Full External Error							± 10.30	2.07	2? Confidence Limit
	Material = biotite				Decay Constant 39Ar = 2.940 ± 0.016 E-07 1/h					Analytical Error							± 4.84	14510	Error Magnification
	Lithology = mylonite				Decay Constant 37Ar = 8.230 ± 0.012 E-04 1/h
	Mass Discrimination Law = LIN				Decay Constant 36Cl = 2.257 ± 0.015 E-06 1/a					Total Fusion Age				5602165	± 0.83693	382.93	± 7.13		17	1.13	± 0.11
	Irradiation = OR2				Decay Activity 40K(EC,??) = 3.310 ± 0.040 1/gs										± 1.49%		± 1.86%
	J = 0.00423 ± 0.00003				Decay Activity 40K(??) = 28.270 ± 0.050 1/gs					Full External Error							± 10.41
	FC = 28.2 ± 0.04 Ma				Atmospheric Ratio 40/36(a) = 298.50					Analytical Error							± 5.16
					Atmospheric Ratio 38/36(a) = 0.1869
					Production Ratio 39/37(ca) = 0.000695 ± 0.000009					Normal Isochron		85.72	± 110.53	5686810	± 0.51055	388.14	± 5.88	0.68	85.87
					Production Ratio 38/37(ca) = 0.000020 ± 0.000001								± 128.93%		± 0.90%		± 1.52%	0.67	8
					Production Ratio 36/37(ca) = 0.000265 ± 0.000002					Full External Error							± 9.67	2.15	2? Confidence Limit
					Production Ratio 40/39(k) = 0.000730 ± 0.000092					Analytical Error							± 3.14	10000	Error Magnification
					Production Ratio 38/39(k) = 0.012200												1		Number of Iterations
					Production Ratio 36/38(cl) = 262.80 ± 1.71												0.019833		Convergence
					Scaling Ratio K/Ca = 0.430 ± 0.009
					Abundance Ratio 40K/K = 1.1700 ± 0.0100 E-04					Inverse Isochron Clustered Points		304.04	± 382.16	5703644	± 0.60051	389.17	± 6.20	0.86	85.87
					Atomic Weight K = 39.0983 ± 0.0001 g								± 125.69%		± 1.05%		± 1.59%	0.52	8
	Instrument = Argus VI (ThermoScientific, Bremen DE)									Full External Error							± 9.88	2.15	2? Confidence Limit
										Analytical Error							± 3.69	10000	Error Magnification
																	6		Number of Iterations
																	0.051713		Convergence
																	0.03		Spreading Factor
	Relative Abundances			36Ar [fA]	%1s	37Ar [fA]	%1s	38Ar [fA]	%1s	39Ar [fA]	%1s	40Ar [fA]	%1s	40(r)/39(k)	± 2s	Age	± 2s	40Ar(r)	39Ar(k)	K/Ca	± 2s		Normal Isochron			39(k)/36(a)	± 2s	40(a+r)/36(a)	± 2s	r.i.		Inverse Isochron			39(k)/40(a+r)	± 2s	36(a)/40(a+r)	± 2s	r.i.
																(Ma)		(%)	(%)
	ACO14056-2A	0.10 W		0.0790676	107284	2140963	54702	0.0444248	245370	3376722	0.181	1858817	0.015	5435570	± 1.51276	372.64	± 9.37	98.74	7.27	6.8	± 7.4		ACO14056-2A	0.10 W		430.14	± 929.61	23678.8	± 51174.88	10000		ACO14056-2A	0.10 W		0.0181654	± 0.0000660	4.223e-05	± 0.00009127	0
	ACO14056-2B	0.20 W	4	0.0157406	458944	0.089609	1264020	15452127	4924	11498208	0.109	6481672	0.018	5632955	± 0.39511	384.82	± 2.43	99.93	24.74	551.8	± 13948.6		ACO14056-2B	0.20 W	4	7309.38	± 67134.27	412032	± 3784384.92	10000		ACO14056-2B	0.20 W	4	0.0177398	± 0.0000391	2.43e-06	± 0.00002229	0
	ACO14056-2C	0.30 W	4	0.0558477	211734	0.546998	261076	12595613	6352	12409960	0.082	7024297	0.018	5673622	± 0.57679	387.33	± 3.54	100.24	26.71	97.6	± 509.4		ACO14056-2C	0.30 W	4	2216.35	± 9361.30	125449	± 529863.83	10000		ACO14056-2C	0.30 W	4	0.0176674	± 0.0000297	7.97e-06	± 0.00003367	0
	ACO14056-2D	0.40 W	4	0.0753447	158472	3722749	39560	0.73386	13568	7312915	0.154	4086264	0.014	5557508	± 0.98989	380.18	± 6.11	99.46	15.74	8.4	± 6.7		ACO14056-2D	0.40 W	4	983.44	± 3158.32	54953.1	± 176482.73	10000		ACO14056-2D	0.40 W	4	0.0178959	± 0.0000555	1.82e-05	± 0.00005844	0
	ACO14056-2E	0.50 W	4	0.120334	75963	2182824	56130	0.667709	14795	3978130	0.216	2238876	0.019	5538269	± 1.39278	378.99	± 8.60	98.4	8.56	7.8	± 8.8		ACO14056-2E	0.50 W	4	332.28	± 507.41	18700.9	± 28557.57	10000		ACO14056-2E	0.50 W	4	0.017768	± 0.0000772	5.347e-05	± 0.00008166	0
	ACO14056-2F	0.60 W		0.609279	15615	4067998	19738	0.0727253	103053	2471685	0.427	1394829	0.016	4909208	± 2.33637	339.73	± 14.74	86.98	5.32	2.6	± 1.0		ACO14056-2F	0.60 W		40.63	± 12.72	2293.34	± 717.48	0.9996		ACO14056-2F	0.60 W		0.0177185	± 0.0001514	0.00043605	± 0.00013642	0
	ACO14056-2G	0.70 W		0.135337	87276	0.353052	438110	0.126511	90278	1594906	0.633	893791	0.019	5350409	± 4.47281	367.35	± 27.79	95.48	3.43	19.4	± 170.2		ACO14056-2G	0.70 W		117.77	± 205.43	6599.55	± 11511.72	10000		ACO14056-2G	0.70 W		0.0178448	± 0.0002258	0.00015153	± 0.00026431	0
	ACO14056-2H	0.80 W		0.0043114	2722487	0.013236	12740553	0.173648	47779	733936	1252	416246	0.037	5653907	± 9.65226	386.11	± 59.35	99.69	1.58	238.4	± 60757.9		ACO14056-2H	0.80 W		1711.27	± 93669.31	97052.2	± 5312314.22	10000		ACO14056-2H	0.80 W		0.0176325	± 0.0004417	1.03e-05	± 0.00056399	0
	ACO14056-2I	0.90 W		0.0404739	412101	0.873096	130316	0.0744025	81662	653847	1912	369163	0.041	5462737	± 15.37330	374.32	± 95.15	96.74	1.41	3.2	± 8.4		ACO14056-2I	0.90 W		162.46	± 1346.73	9173.34	± 76041.73	10000		ACO14056-2I	0.90 W		0.0177102	± 0.0006774	0.00010901	± 0.00090364	0
	ACO14056-2J	1.00 W		0.103262	122037	6254057	28542	0.104611	72534	961078	0.968	540030	0.03	5947493	± 7.91583	404.08	± 48.20	105.8	2.07	0.7	± 0.4		ACO14056-2J	1.00 W		91.56	± 219.94	5146.94	± 12363.73	10000		ACO14056-2J	1.00 W		0.0177889	± 0.0003446	0.00019429	± 0.00046672	0
	ACO14056-2K	1.20 W		0.158061	58696	1010436	119468	0.418623	27847	1189546	0.814	679821	0.025	5317410	± 4.73574	365.3	± 29.46	93.05	2.56	5.1	± 12.1		ACO14056-2K	1.20 W		75.16	± 88.12	4295.18	± 5035.43	0.9999		ACO14056-2K	1.20 W		0.0174992	± 0.0002849	0.00023282	± 0.00027294	0
	ACO14056-2L	1.40 W		0.10873	94417	2309227	80983	0.231461	28517	298473	3274	182537	0.057	5019796	± 20.78427	346.69	± 130.63	82.12	0.64	0.6	± 0.9		ACO14056-2L	1.40 W		27.32	± 51.35	1670	± 3137.06	0.9994		ACO14056-2L	1.40 W		0.0163604	± 0.0010708	0.0005988	± 0.00112483	0
	ACO14056-2M	1.60 W		0.0652347	108864	2410855	72356	0.0024733	3746028	0.06429	191607	16568	0.777	57863283	± 2375.40253	2232.04	± 5263.00	218.69	0.01	0	± 0.0		ACO14056-2M	1.60 W		0.95	± 4.26	251.5	± 542.29	0.4805		ACO14056-2M	1.60 W		0.0037794	± 0.0148715	0.00397611	± 0.00857327	0
	ACO14056-2N	1.80 W		0.0413165	227013	0.511646	219358	0.171083	59658	0.07746	231124	14766	0.295	35094233	± 1784.21470	0	± 28447.93	183.25	0.02	0.1	± 0.4		ACO14056-2N	1.80 W		1.87	± 12.18	358.57	± 1633.36	0.7003		ACO14056-2N	1.80 W		0.0052216	± 0.0242483	0.00278888	± 0.01270403	0
	ACO14056-2O	2.00 W		0.154655	68854	0.293325	653666	0.0272093	345574	0.07977	188238	8085	2544	67869949	± 2669.82754	0	± 10943.28	671.3	0.02	0.1	± 1.6		ACO14056-2O	2.00 W		0.52	± 2.07	52.25	± 71.96	0.3439		ACO14056-2O	2.00 W		0.0098909	± 0.0371470	0.0191389	± 0.02635885	0.0005
			S	0.926363	45005	18232131	30861	51575993	6842	46470112	0.094	26205762	0.007
	Information on Analysis and Constants Used in Calculations									Results		40(a)/36(a)	± 2s	40(r)/39(k)	± 2s	Age	± 2s	MSWD	39Ar(k)	K/Ca	± 2s
																(Ma)			(%,n)
	Project = H45				Age Equations = Min et al. (2000)					Age Plateau				5632629	± 0.43309	384.8	± 5.61	2.05	75.75	8.2	± 5.3
	Analyst = Roberto Siqueira/Danilo Anacleto				Negative Intensities = Allowed										± 0.77%		± 1.46%	0.1	4
	Sample =14056_2				Decay Constant 40K = 5.530 ± 0.048 E-10 1/a					Full External Error							± 9.46	2.63	2? Confidence Limit
	Material = biotite				Decay Constant 39Ar = 2.940 ± 0.016 E-07 1/h					Analytical Error							± 2.67	14330	Error Magnification
	Lithology = mylonite				Decay Constant 37Ar = 8.230 ± 0.012 E-04 1/h
	Mass Discrimination Law = LIN				Decay Constant 36Cl = 2.257 ± 0.015 E-06 1/a					Total Fusion Age				5580170	± 0.54596	381.57	± 5.95		15	11	± 6.8
	Irradiation = OR2				Decay Activity 40K(EC,??) = 3.310 ± 0.040 1/gs										± 0.98%		± 1.56%
	J = 0.00423 ± 0.00003				Decay Activity 40K(??) = 28.270 ± 0.050 1/gs					Full External Error							± 9.62
	FC = 28.2 ± 0.04 Ma				Atmospheric Ratio 40/36(a) = 298.50					Analytical Error							± 3.37
					Atmospheric Ratio 38/36(a) = 0.1869
					Production Ratio 39/37(ca) = 0.000695 ± 0.000009					Normal Isochron Overestimated Error		48.74	± 165.56	5641705	± 0.38161	385.36	± 5.48	0.26	75.75
					Production Ratio 38/37(ca) = 0.000020 ± 0.000001								± 339.72%		± 0.68%		± 1.42%	0.77	4
					Production Ratio 36/37(ca) = 0.000265 ± 0.000002					Full External Error							± 9.39	3	2? Confidence Limit
					Production Ratio 40/39(k) = 0.000730 ± 0.000092					Analytical Error							± 2.35	10000	Error Magnification
					Production Ratio 38/39(k) = 0.012200												1		Number of Iterations
					Production Ratio 36/38(cl) = 262.80 ± 1.71												1.31e-08		Convergence
					Scaling Ratio K/Ca = 0.430 ± 0.009
					Abundance Ratio 40K/K = 1.1700 ± 0.0100 E-04					Inverse Isochron Clustered Points		402.89	± 844.20	5646077	± 0.41519	385.63	± 5.57	0.66	75.75
					Atomic Weight K = 39.0983 ± 0.0001 g								± 209.53%		± 0.74%		± 1.44%	0.52	4
	Instrument = Argus VI (ThermoScientific, Bremen DE)									Full External Error							± 9.45	3	2? Confidence Limit
										Analytical Error							± 2.55	10000	Error Magnification
																	5		Number of Iterations
																	1.36958		Convergence
																	0.01		Spreading Factor
